# Supplementary material for: Molecular nitrogen induced structural evolution of single transition metal atoms supported by B/N co-doped graphene for enhanced nitrogen electroreduction performance
Source: Royal Society of Chemistry journal article supplement (doi:10.1039/d3cp03451h), 2023-01-01
Supplement: d3cp03451h1.pdf [file d3cp03451h1.pdf]

**Electronic Supplementary Material (ESI)**

**Supporting Information**

**Molecular nitrogen induced structure evolution of single transition  
metal atom supported by B/N co-doped graphene for enhanced  
nitrogen electroreduction performance**

Zhiqiang Bai,<sup>a,b</sup> Jian Wang,<sup>\*f</sup> Xiaomeng Peng,<sup>f</sup> Yufang Liu,<sup>\*a,c</sup> and Wenhua Zhang<sup>\*d,e</sup>

<sup>a</sup> School of Physics, Henan Normal University, Xinxiang, Henan, 453007, China. E-mail: yf-liu@htu.edu.cn

<sup>b</sup> School of Cable Engineering, Henan Institute of Technology, Xinxiang, Henan, 453000, China

<sup>c</sup> Institute of Physics, Henan Academy of Sciences, Zhengzhou, Henan, 450000, China

<sup>d</sup> Hefei National Research Center for Physical Sciences at the Microscale, CAS Key Laboratory of Materials for Energy Conversion and Synergetic Innovation Centre of Quantum Information & Quantum Physics, University of Science and Technology of China, Hefei, Anhui 230026, China. E-mail: whhzhang@ustc.edu.cn

<sup>e</sup> Laboratory for Chemical Technology, Ghent University, Technologiepark-Zwijinaarde 125, B-9052 Ghent, Belgium

<sup>f</sup> Research and Development Centre, China Tobacco Anhui Industrial Co., Ltd., Hefei, 230088, Anhui, China. E-mail: wangj86@mail.ustc.edu.cn

**Table S1** The formation energies (eV) of B<sub>2</sub>N<sub>2</sub>/G, B<sub>2</sub>N<sub>2</sub>/G-1, B<sub>2</sub>N<sub>2</sub>/G-2 and N<sub>3</sub>B<sub>2</sub>/G.

| Defect           | B <sub>2</sub> N <sub>2</sub> /G | B <sub>2</sub> N <sub>2</sub> /G-1 | B <sub>2</sub> N <sub>2</sub> /G-2 | N <sub>3</sub> B <sub>2</sub> /G |
|------------------|----------------------------------|------------------------------------|------------------------------------|----------------------------------|
| Formation energy | -0.73                            | -0.51                              | -0.35                              | -0.83                            |

\*The formation energies of B<sub>2</sub>N<sub>2</sub>/G, B<sub>2</sub>N<sub>2</sub>/G-1 and B<sub>2</sub>N<sub>2</sub>/G-2 are calculated according to  $E_{\text{form-1}} = E_{\text{B}_2\text{N}_2/\text{G}} + 4E_{\text{C}} - (E_{\text{Gv-2C}} + 2E_{\text{B}} + 2E_{\text{N}})$ , where  $E_{\text{B}_2\text{N}_2/\text{G}}$ ,  $E_{\text{Gv-2C}}$ ,  $E_{\text{C}}$ ,  $E_{\text{B}}$  and  $E_{\text{N}}$  are the energies of B(N)-codoped graphene, divacancy graphene, atomic C, B and N, respectively. While the formation energies of N<sub>3</sub>B<sub>2</sub>/G is calculated according to  $E_{\text{form-2}} = E_{\text{N}_3\text{B}_2/\text{G}} + 5E_{\text{C}} - (E_{\text{Gv-1C}} + 2E_{\text{B}} + 3E_{\text{N}})$ , where  $E_{\text{N}_3\text{B}_2/\text{G}}$  and  $E_{\text{Gv-1C}}$  are the energies of the N<sub>3</sub>B<sub>2</sub>/G structure and monovacancy graphene, respectively.

**Table S2** The binding energies ( $E_b$ , eV) of TM and three substrates, including  $B_2N_2/G$  selected in the works,  $B_2N_2/G-1$ ,  $B_2N_2/G-2$ .

| TM | $E_b$ (eV)                 |                  |                  |
|----|----------------------------|------------------|------------------|
|    | TM- $B_2N_2/G$ in the work | TM- $B_2N_2/G-1$ | TM- $B_2N_2/G-2$ |
| Sc | -7.93                      | -5.05            | -4.61            |
| V  | -7.04                      | -4.09            | -5.04            |
| Cr | -5.37                      | -3.68            | -3.10            |
| Mn | -5.38                      | -4.01            | -3.99            |
| Fe | -6.17                      | -4.73            | -4.99            |
| Co | -6.51                      | -5.29            | -5.39            |
| Ni | -6.70                      | -5.75            | -5.64            |
| Cu | -5.29                      | -4.19            | -2.87            |
| Zn | -3.53                      | -2.69            | -0.71            |
| Y  | -7.79                      | -6.85            | -4.38            |
| Zr | -9.03                      | -8.34            | -6.01            |
| Nb | -8.46                      | -7.28            | -6.76            |
| Mo | -6.31                      | -5.00            | -5.10            |
| Tc | -7.22                      | -6.54            | -5.94            |
| Ru | -8.70                      | -8.12            | -7.48            |
| Rh | -6.85                      | -6.50            | -6.45            |
| Pd | -3.01                      | -2.82            | -2.54            |
| Ag | -2.97                      | -2.15            | -1.47            |
| Hf | -8.73                      | -6.61            | -6.21            |
| Ta | -11.14                     | -9.79            | -9.65            |
| W  | -7.49                      | -6.39            | -6.69            |
| Re | -7.48                      | -6.90            | -6.32            |
| Os | -7.99                      | -7.49            | -7.05            |
| Ir | -7.70                      | -7.27            | -7.38            |
| Pt | -6.68                      | -6.11            | -6.43            |
| Au | -3.23                      | -3.17            | -2.59            |

**Table S3** Adsorption free energies ( $\Delta G$ , eV) of atom hydrogen and molecular  $N_2$  by end-on, side-on, side-on-1 and side-on-2 modes on fourteen TM- $B_2N_2/G$  systems, which preferentially trap H atom. Here the “/” means that the corresponding optimized atomic structures are not obtained.

| TM | $\Delta G^*H$ | $\Delta G^*N_{2\text{-end-on}}$ | $\Delta G^*N_{2\text{-side-on}}$ | $\Delta G^*N_{2\text{-side-on-1}}$ | $\Delta G^*N_{2\text{-side-on-2}}$ |
|----|---------------|---------------------------------|----------------------------------|------------------------------------|------------------------------------|
| Mn | -0.76         | -0.40                           | 0.11                             | 0.02                               | -0.02                              |
| Co | -0.79         | -0.32                           | /                                | 0.99                               | 0.22                               |
| Ni | -0.82         | -0.26                           | /                                | 1.33                               | 0.38                               |
| Zn | 1.17          | /                               | /                                | 1.88                               | 1.61                               |
| Cu | -0.14         | 0.18                            | /                                | /                                  | 0.95                               |
| Y  | -1.25         | -1.02                           | -0.87                            | -1.19                              | -1.06                              |
| Tc | -0.62         | -0.56                           | 0.27                             | -0.17                              | 0.93                               |
| Ru | -0.66         | -0.30                           | 1.33                             | -0.29                              | 1.28                               |
| Rh | -1.27         | -0.09                           | 1.51                             | -0.86                              | 1.60                               |
| Hf | -1.18         | -0.98                           | -0.80                            | -0.82                              | -0.61                              |
| Re | -1.07         | -0.76                           | 0.77                             | -0.97                              | 0.90                               |
| Os | -0.90         | -0.43                           | 1.79                             | -0.57                              | 1.46                               |
| Ir | -1.38         | -0.22                           | 1.76                             | 1.62                               | /                                  |
| Pt | -1.22         | 0.12                            | 1.28                             | /                                  | 2.04                               |

**Table S4** Adsorption free energies ( $\Delta G$ , eV) of atomic hydrogen and molecular  $N_2$  by end-on, side-on, side-on-1 and side-on-2 modes on remaining ten TM- $B_2N_2/G$  systems, which preferentially trap  $N_2$  molecule.

| TM | $\Delta G^*H$ | $\Delta G^*N_{2\text{-end-on}}$ | $\Delta G^*N_{2\text{-side-on}}$ | $\Delta G^*N_{2\text{-side-on-1}}$ | $\Delta G^*N_{2\text{-side-on-2}}$ |
|----|---------------|---------------------------------|----------------------------------|------------------------------------|------------------------------------|
| Sc | -0.07         | -1.05                           | -0.38                            | -1.37                              | -1.26                              |
| Ti | -0.42         | -0.86                           | -0.44                            | -1.84                              | -1.49                              |
| V  | -0.59         | -0.64                           | -0.27                            | -1.15                              | -0.51                              |
| Cr | -0.17         | -0.26                           | -0.17                            | -0.79                              | -0.06                              |
| Fe | 0.20          | -0.35                           | 0.74                             | -0.51                              | 0.24                               |
| Zr | -0.98         | -1.68                           | -0.48                            | -2.95                              | -2.72                              |
| Nb | -1.09         | -1.39                           | -0.76                            | -2.12                              | -1.18                              |
| Mo | -0.44         | -0.53                           | -0.41                            | -1.06                              | -0.09                              |
| Ta | -1.19         | -1.56                           | -1.16                            | -2.54                              | -1.63                              |
| W  | -1.03         | -1.16                           | -1.35                            | -3.09                              | -0.59                              |

**Table S5** Hydrogenation free energies ( $\Delta G$ , eV) of adsorbed side-on-1 N<sub>2</sub> on TM-B<sub>2</sub>N<sub>2</sub>/G.

|    | *N*NH | *N*NH <sub>2</sub> | *N*NH <sub>3</sub> | *NH*NH <sub>3</sub> |
|----|-------|--------------------|--------------------|---------------------|
| Sc | -0.05 | -1.29              | -0.94              | 1.56                |
|    | *N*NH | *NH*NH             |                    |                     |
|    | -0.05 | 0.51               |                    |                     |
| Ti | *N*NH | *N*NH <sub>2</sub> | *N*NH <sub>3</sub> | *NH*NH <sub>3</sub> |
|    | -1.08 | -1.51              | -0.32              | 1.29                |
|    | *N*NH | *NH*NH             |                    |                     |
|    | -1.08 | 0.49               |                    |                     |
| V  | *N*NH | *N*NH <sub>2</sub> | *N*NH <sub>3</sub> | *NH*NH <sub>3</sub> |
|    | -1.91 | -1.04              | -0.51              | 1.08                |
|    | *N*NH | *NH*NH             |                    |                     |
|    | -1.91 | 0.79               |                    |                     |
| Cr | *N*NH | *N*NH <sub>2</sub> | *N*NH <sub>3</sub> | *NH*NH <sub>3</sub> |
|    | -2.31 | -1.15              | -0.42              | 1.23                |
|    | *N*NH | *NH*NH             |                    |                     |
|    | -2.31 | 0.72               |                    |                     |
| Fe | *N*NH | *N*NH <sub>2</sub> | *N*NH <sub>3</sub> | *NH*NH <sub>3</sub> |
|    | -1.17 | -0.72              | -0.33              | 0.99                |
|    | *N*NH | *NH*NH             |                    |                     |
|    | -1.17 | 0.81               |                    |                     |
| Zr | *N*NH | *N*NH <sub>2</sub> | *N*NH <sub>3</sub> | *NH*NH <sub>3</sub> |
|    | -0.47 | -1.33              | 0.13               | 1.15                |
|    | *N*NH | *NH*NH             |                    |                     |
|    | -0.47 | 0.61               |                    |                     |
| Nb | *N*NH | *N*NH <sub>2</sub> | *N*NH <sub>3</sub> | *NH*NH <sub>3</sub> |
|    | -1.34 | -0.89              | 0.22               | 1.36                |
|    | *N*NH | *NH*NH             |                    |                     |
|    | -1.34 | 0.60               |                    |                     |
| Mo | *N*NH | *N*NH <sub>2</sub> | *N*NH <sub>3</sub> | *NH*NH <sub>3</sub> |
|    | -0.87 | -0.63              | -0.14              | 1.05                |
|    | *N*NH | *NH*NH             |                    |                     |
|    | -0.87 | 0.55               |                    |                     |
| Ta | *N*NH | *N*NH <sub>2</sub> | *N*NH <sub>3</sub> | *NH*NH <sub>3</sub> |
|    | -1.41 | -0.44              | 0.08               | 1.54                |
|    | *N*NH | *NH*NH             |                    |                     |
|    | -1.41 | 0.59               |                    |                     |
| W  | *N*NH | *N*NH <sub>2</sub> | *N*NH <sub>3</sub> | *NH*NH <sub>3</sub> |
|    | -0.60 | -0.13              | -0.15              | 1.80                |
|    | *N*NH | *NH*NH             |                    |                     |
|    | -0.60 | 0.74               |                    |                     |

**Table S6** Adsorption free energies ( $G^{\text{*NH}_3}$ , eV) of the first formed  $\text{*NH}_3$  on N-TM- $\text{B}_2\text{N}_2/\text{G}$ .

| TM                 | Sc    | Ti    | V     | Cr    | Fe    | Zr    | Nb    | Mo    | Ta    | W     |
|--------------------|-------|-------|-------|-------|-------|-------|-------|-------|-------|-------|
| $G^{\text{*NH}_3}$ | -1.55 | -2.09 | -1.89 | -1.49 | -1.41 | -1.75 | -1.83 | -1.61 | -2.07 | -1.74 |

**Table S7** The comparison of binding energies ( $E_b$ , eV) of TM single atoms supported by  $B_2N_2/G$  and  $N_3B_2/G$  substrates.

| TM             | Sc    | Ti    | V     | Cr    | Fe    | Zr    | Nb    | Mo    | Ta     | W     |
|----------------|-------|-------|-------|-------|-------|-------|-------|-------|--------|-------|
| TM- $B_2N_2/G$ | -7.93 | -7.91 | -7.04 | -5.37 | -6.17 | -9.03 | -8.46 | -6.31 | -11.14 | -7.49 |
| TM- $N_3B_2/G$ | -8.99 | -8.64 | -7.83 | -6.20 | -6.19 | -9.37 | -8.83 | -6.59 | -11.46 | -7.80 |



**Table S8** The adsorption free energies (eV) of the 1<sup>st</sup>, 2<sup>nd</sup>, 3<sup>rd</sup> and even 4<sup>th</sup> N<sub>2</sub> molecule on TM-N<sub>3</sub>B<sub>2</sub>/G, accompanying with the corresponding free energies of competitive hydrogen adsorption. Here the “/” means that the corresponding optimized atomic structures are not obtained.

| TM                                       | Sc                     | Ti                     | V                      | Cr                     | Fe                     | Zr    | Nb                      | Mo                      | Ta                      | W                       |
|------------------------------------------|------------------------|------------------------|------------------------|------------------------|------------------------|-------|-------------------------|-------------------------|-------------------------|-------------------------|
| Reactants                                | *N <sub>2-end-on</sub> | *H    | *2N <sub>2-end-on</sub> | *2N <sub>2-end-on</sub> | *3N <sub>2-end-on</sub> | *3N <sub>2-end-on</sub> |
| $\Delta G^*H$                            | 0.55                   | -0.01                  | -0.34                  | -0.30                  | -0.48                  | -1.31 | -0.79                   | -0.50                   | -1.26                   | -0.88                   |
| $\Delta G^*N_{2-end-on}$                 | -0.16                  | -1.01                  | -0.73                  | -0.40                  | -0.90                  | -1.03 | -1.20                   | -0.64                   | -1.43                   | -1.00                   |
| $\Delta G^*N_{2-side-on}$                | -0.02                  | -0.81                  | -0.42                  | -0.12                  | -0.63                  | -1.19 | -1.05                   | -0.38                   | -1.28                   | -0.67                   |
| $\Delta G^*N_{2-end-on}^*H$              | 0.68                   | 0.54                   | 0.45                   | 0.38                   | 0.48                   | /     | 0.34                    | 0.08                    | 0.02                    | 0.24                    |
| $\Delta G^*2N_{2-end-on}$                | 0.13                   | 0.14                   | 0.10                   | 0.05                   | 0.07                   |       | -0.20                   | -0.65                   | -0.06                   | -0.65                   |
| $\Delta G^*N_{2-end-on}^*N_{2-side-on}$  | /                      | 0.53                   | 0.31                   | 0.44                   | 0.60                   |       | 0.20                    | 0.06                    | 0.22                    | -0.31                   |
| $\Delta G^*2N_{2-end-on}^*H$             |                        |                        |                        |                        |                        |       | 0.59                    | 0.63                    | 0.07                    | 0.08                    |
| $\Delta G^*3N_{2-end-on}$                |                        |                        |                        |                        |                        |       | 0.30                    | 0.16                    | -0.01                   | -0.18                   |
| $\Delta G^*2N_{2-end-on}^*N_{2-side-on}$ |                        |                        |                        |                        |                        |       | 0.62                    | 0.36                    | 0.25                    | 0.05                    |
| $\Delta G^*3N_{2-end-on}^*H$             |                        |                        |                        |                        |                        |       |                         |                         | 0.40                    | 0.58                    |
| $\Delta G^*4N_{2-end-on}$                |                        |                        |                        |                        |                        |       |                         |                         | 0.43                    | 0.73                    |

**Table S9** Hydrogenation free energies ( $\Delta G^*_{\text{NNH}}$ ) of the 1<sup>st</sup>, 2<sup>nd</sup>, and 3<sup>rd</sup> adsorbed end-on  $\text{N}_2$  molecule to  $^*\text{NNH}$  on  $\text{W}(\text{Nb, Ta, Mo})\text{-N}_3\text{B}_2/\text{G}$ , and their charge states ( $Q_{\text{N}_2}$ , e), bond lengths ( $L_{\text{N-N}}$ , Å) of N-N bond and distances ( $D_{\text{TM-N}}$ , Å) between TM single atom and near-end N atom of adsorbed  $\text{N}_2$  molecules.

| TM | Number            | $\Delta G^*_{\text{NNH}}/\text{eV}$ | $Q_{\text{N}_2}/\text{e}$ | $L_{\text{N-N}}/\text{Å}$ | $D_{\text{TM-N}}/\text{Å}$ |                                                                                      |
|----|-------------------|-------------------------------------|---------------------------|---------------------------|----------------------------|--------------------------------------------------------------------------------------|
| W  | N <sub>2</sub> -1 | 0.56                                | 0.305                     | 1.138                     | 2.117                      | 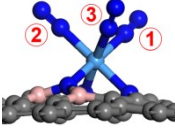  |
|    | N <sub>2</sub> -2 | 0.27                                | 0.415                     | 1.142                     | 2.039                      |                                                                                      |
|    | N <sub>2</sub> -3 | 0.27                                | 0.415                     | 1.142                     | 2.039                      |                                                                                      |
| Nb | N <sub>2</sub> -1 | 0.77                                | 0.412                     | 1.140                     | 2.143                      |   |
|    | N <sub>2</sub> -2 | 0.77                                | 0.412                     | 1.140                     | 2.143                      |                                                                                      |
| Ta | N <sub>2</sub> -1 | 0.73                                | 0.317                     | 1.135                     | 2.249                      |   |
|    | N <sub>2</sub> -2 | 0.52                                | 0.376                     | 1.140                     | 2.139                      |                                                                                      |
|    | N <sub>2</sub> -3 | 0.52                                | 0.376                     | 1.140                     | 2.139                      |                                                                                      |
| Mo | N <sub>2</sub> -1 | 0.74                                | 0.363                     | 1.139                     | 2.058                      |  |
|    | N <sub>2</sub> -2 | 0.74                                | 0.363                     | 1.139                     | 2.058                      |                                                                                      |

**Table S10** Hydrogenation free energies ( $\Delta G$ , eV) of the 3<sup>rd</sup> adsorbed end-on N<sub>2</sub> molecule along alternating and distal pathways on W-N<sub>3</sub>B<sub>2</sub>/G in the presence of other two adsorbed N<sub>2</sub> molecules. Where \* represent 2N<sub>2</sub>-W-N<sub>3</sub>B<sub>2</sub>/G.

|             |      |                   |                    |                                  |                  |                  |
|-------------|------|-------------------|--------------------|----------------------------------|------------------|------------------|
| Alternating | *NNH | *NHNH             | *NHNH <sub>2</sub> | *NH <sub>2</sub> NH <sub>2</sub> | *NH <sub>2</sub> | *NH <sub>3</sub> |
|             | 0.27 | 0.72              | -0.54              | -0.02                            | -1.09            | -0.39            |
| Distal      | *NNH | *NNH <sub>2</sub> | *N                 | *NH                              | *NH <sub>2</sub> | *NH <sub>3</sub> |
|             | 0.27 | -0.37             | 0.06               | -0.51                            | -0.11            | -0.39            |

**Table S11** Free energies ( $\Delta G$ , eV) of competitive H adsorption along energy-favorable distal pathway on W-N<sub>3</sub>B<sub>2</sub>/G in the presence of other two end-on adsorbed N<sub>2</sub> molecules and N<sub>x</sub>H<sub>y</sub> intermediates.

|                |                 |                    |                   |                      |       |                  |                     |
|----------------|-----------------|--------------------|-------------------|----------------------|-------|------------------|---------------------|
| Distal pathway | *N <sub>2</sub> | *NNH               | *NNH <sub>2</sub> | *N                   | *NH   | *NH <sub>2</sub> | *NH <sub>3</sub>    |
|                | -0.18           | 0.27               | -0.37             | 0.06                 | -0.51 | -0.11            | -0.39               |
| H adsorption   | *H              | *N <sub>2</sub> *H | *NNH*H            | *NNH <sub>2</sub> *H | *N*H  | *NH*H            | *NH <sub>2</sub> *H |
|                | -0.10           | 0.58               | 0.68              | 0.51                 | 0.87  | 0.17             | 0.36                |

**Table S12** The adsorption free energies ( $\Delta G$ , eV) of  $^*H$ ,  $^*H_2O$ ,  $^*N_2$  on clean  $W-B_2N_2/G$  and reconstructed  $W-N_3B_2/G$  in the presence of no any reactant, one end-on  $N_2$  molecule and two end-on  $N_2$  molecules, respectively.

| Reactants                      | TM                                    | Configuration                                                                        | W     |
|--------------------------------|---------------------------------------|--------------------------------------------------------------------------------------|-------|
| Clean $W-B_2N_2/G$             | $\Delta G^{*H}/eV$                    | 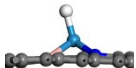   | -1.03 |
|                                | $\Delta G^{*N_2\text{-end-on}}/eV$    |    | -1.16 |
|                                | $\Delta G^{*N_2\text{-side-on}}/eV$   |    | -1.35 |
|                                | $\Delta G^{*N_2\text{-side-on-1}}/eV$ |    | -3.09 |
|                                | $\Delta G^{*N_2\text{-side-on-2}}/eV$ |   | -0.59 |
|                                | $\Delta G^{*H_2O}/eV$                 |  | -1.17 |
| Clean $W-N_3B_2/G$             | $\Delta G^{*H}/eV$                    |  | -0.88 |
|                                | $\Delta G^{*N_2\text{-end-on}}/eV$    |  | -1.00 |
|                                | $\Delta G^{*N_2\text{-side-on}}/eV$   |  | -0.67 |
| $N_2\text{-end-on-}W-N_3B_2/G$ | $\Delta G^{*H_2O}/eV$                 |  | -0.92 |
|                                | $\Delta G^{*H}/eV$                    |  | 0.24  |
| $N_2\text{-end-on-}W-N_3B_2/G$ | $\Delta G^{*N_2\text{-end-on}}/eV$    |  | -0.65 |
|                                | $\Delta G^{*N_2\text{-side-on}}/eV$   |  | -0.41 |

---

|                                                             |                                    |                                                                                    |       |
|-------------------------------------------------------------|------------------------------------|------------------------------------------------------------------------------------|-------|
|                                                             | $\Delta G^{+H_2O}/eV$              |  | -0.35 |
|                                                             | $\Delta G^{+H}/eV$                 |  | 0.08  |
| *2N <sub>2</sub> -end-on-W-N <sub>3</sub> B <sub>2</sub> /G | $\Delta G^{+N_2\text{-end-on}}/eV$ |  | -0.18 |
|                                                             | $\Delta G^{+H_2O}/eV$              |  | 0.13  |

---

**Table S13** Hydrogenation free energies ( $\Delta G$ , eV) along alternating and distal pathways on  $W-N_3B_2/G$  with only one end-on  $N_2$  molecules. Where \* represent  $W-N_3B_2/G$ .

|             |      |                   |                    |                                  |                  |                  |
|-------------|------|-------------------|--------------------|----------------------------------|------------------|------------------|
| Alternating | *NNH | *NHHH             | *NHHH <sub>2</sub> | *NH <sub>2</sub> NH <sub>2</sub> | *NH <sub>2</sub> | *NH <sub>3</sub> |
|             | 0.34 | -0.78             | -0.17              | 1.04                             | -1.70            | -0.15            |
| Distal      | *NNH | *NNH <sub>2</sub> | *N                 | *NH                              | *NH <sub>2</sub> | *NH <sub>3</sub> |
|             | 0.34 | -0.84             | -0.04              | -0.60                            | -0.13            | -0.15            |

**Table S14** Adsorption free energies of atomic H and N<sub>2</sub> molecules on W-N<sub>3</sub>-pyridine/G and W-N<sub>3</sub>-pyrrolic/G during the adsorption saturation.

| TM                                              | W-N <sub>3</sub> -pyridine/G | W-N <sub>3</sub> -pyrrolic/G |
|-------------------------------------------------|------------------------------|------------------------------|
| Reactants                                       | *3N <sub>2</sub> -end-on     | *3N <sub>2</sub> -end-on     |
| $\Delta G^{*H}/\text{eV}$                       | -0.54                        | -0.47                        |
| $\Delta G^{*N_2\text{-end-on}}/\text{eV}$       | -0.74                        | -0.63                        |
| $\Delta G^{*N_2\text{-side-on}}/\text{eV}$      | -0.61                        | -0.58                        |
| $\Delta G^{*N_2\text{-end-on}^*H}/\text{eV}$    | -0.19                        | -0.21                        |
| $\Delta G^{*2N_2\text{-end-on}}/\text{eV}$      | -0.46                        | -0.33                        |
| $\Delta G^{*2N_2\text{-end-on}^*H}/\text{eV}$   | 0.02                         | 0.26                         |
| $\Delta G^{*3N_2\text{-end-on}}/\text{eV}$      | -0.09                        | -0.15                        |
| $\Delta G^{*3N_2\text{-end-on}^*H}/\text{eV}$   | 0.55                         | 0.59                         |
| $\Delta G^{*4N_2\text{-end-on}}/\text{eV}$      | 0.21                         | 0.44                         |
| $\Delta G^{*2N_2\text{-end-on}^*NNH}/\text{eV}$ | 0.36                         | 0.34                         |



**Table S15** The adsorption free energies of  $N_2$  molecule ( $\Delta G^*_{N_2}$ , eV), the formation free energies of ( $\Delta G^*_{NNH}$ , eV), the charge states ( $Q^*_{N_2}$ , e) of adsorbed  $N_2$  molecule, the bond lengths ( $L_{W-N}$ , Å) of between  $W$  single atom and  $N$  atom of adsorbed  $N_2$  molecule, and the bond lengths ( $L_{N-N}$ , Å) of adsorbed  $N_2$  molecule on  $W-N_3B_2/G$ ,  $W-N_3\text{-pyridine}/G$  and  $W-N_3\text{-pyrrolic}/G$ .

| Catalyst                  | $\Delta G^*_{N_2}$ | $\Delta G^*_{NNH}$ | $Q_{N_2}$ | $L_{W-N}$ | $L_{N-N}$ |
|---------------------------|--------------------|--------------------|-----------|-----------|-----------|
| $W-N_3B_2/G$              | -0.18              | 0.27               | 0.427     | 2.034     | 1.142     |
| $W-N_3\text{-pyrrolic}/G$ | -0.15              | 0.34               | 0.414     | 2.054     | 1.140     |
| $W-N_3\text{-pyridine}/G$ | -0.09              | 0.36               | 0.410     | 2.059     | 1.139     |

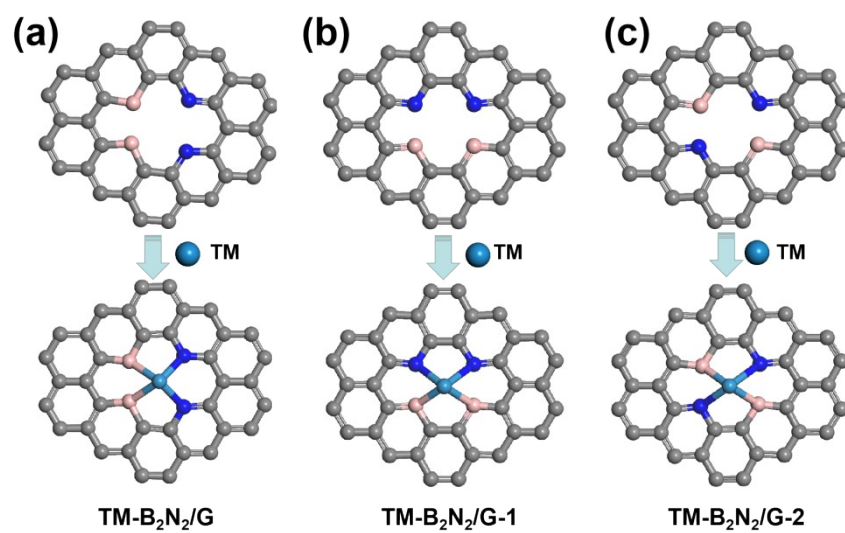

**Fig. S1** Three possible arrangements of B and N dopants at B(N)-dual-doped graphene, including  $\text{B}_2\text{N}_2/\text{G}$  selected in this work (a),  $\text{B}_2\text{N}_2/\text{G-1}$  (b) and  $\text{B}_2\text{N}_2/\text{G-2}$  (c). Where the gray, blue, dark red, and green balls represent C, N, B and TM atoms, respectively.

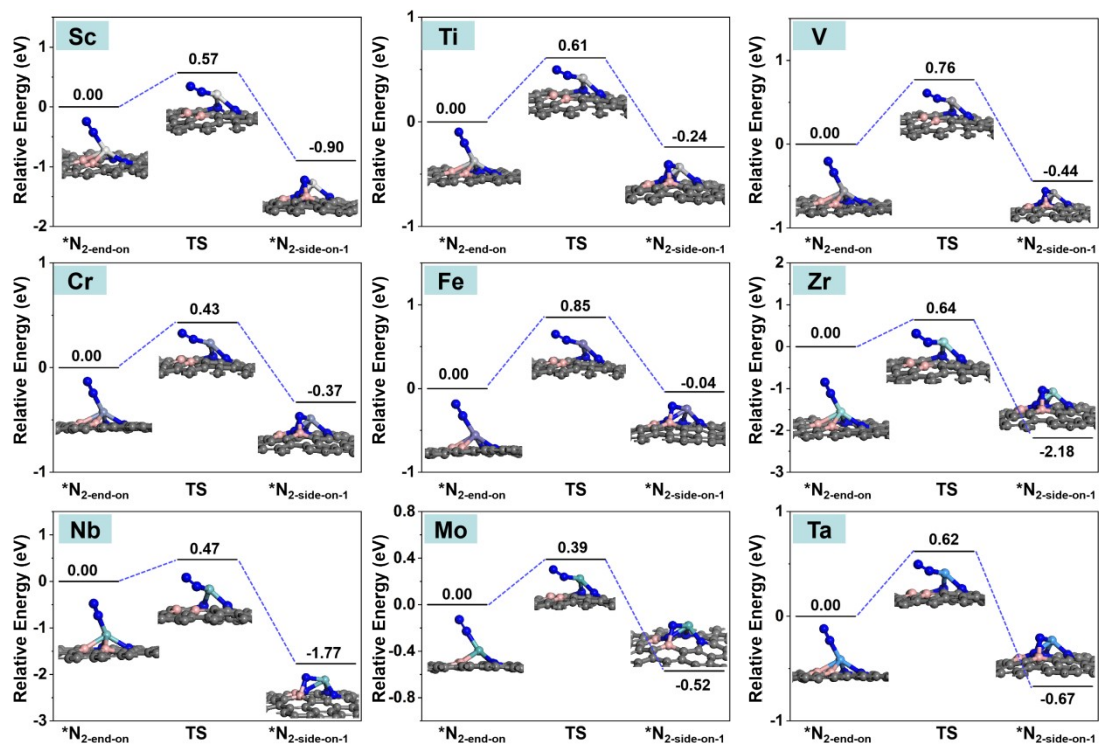

**Fig. S2** The computed energy barriers for the pattern evolution of nitrogen adsorption from  $*N_{2-end-on}$  (Fig. 2(a)) into novel  $*N_{2-side-on-1}$  (Fig. 2(c)) on Sc(Ti, V, Cr, Fe, Zr, Nb, Mo, Ta)- $B_2N_2/G$ , accompanying with the optimized configurations of transition state (TS). Where the gray, blue, dark red, white and green balls represent C, N, B, H and TM atoms, respectively.

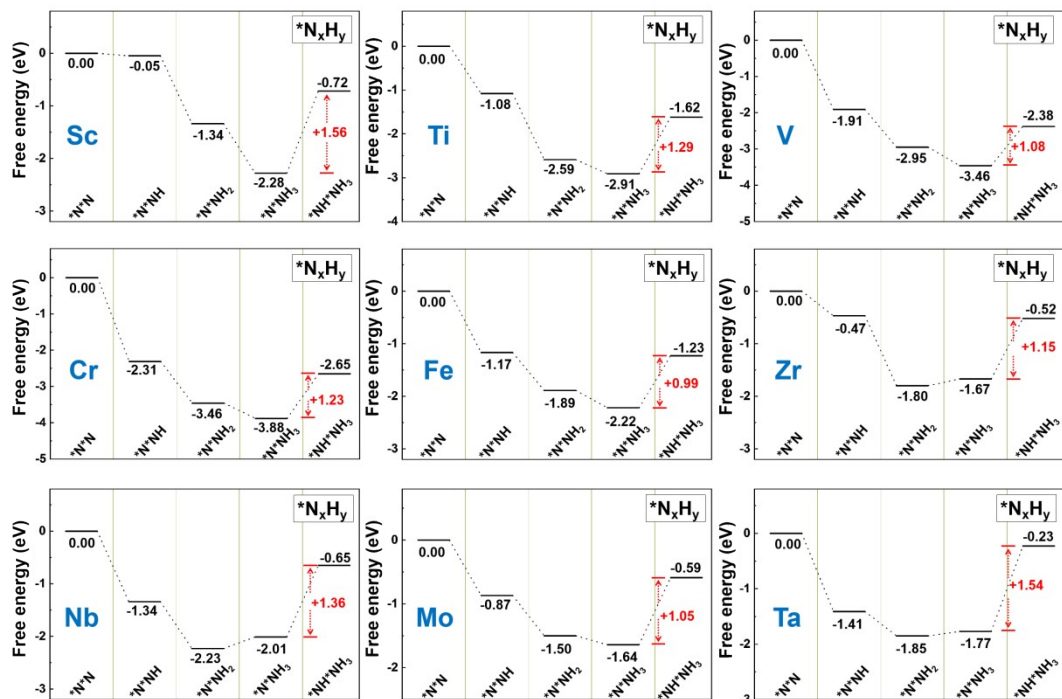

Fig. S3 Hydrogenation free energies of adsorbed side-on-1  $N_2$  molecule on TM- $B_2N_2/G$ .

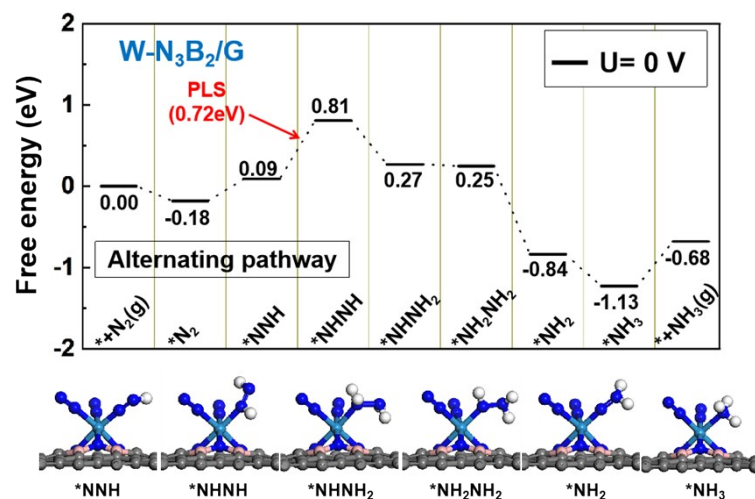

**Fig. S4** Free energy diagram of hydrogenation toward ammonia of the third adsorbed end-on  $N_2$  molecule on  $W-N_3B_2/G$  along alternating pathway in the presence of other two end-on  $N_2$  molecules, accompanying with the optimized intermediates. Where \* represents  $2N_2-W-N_3B_2/G$ , and the gray, blue, dark red, white and green balls represent C, N, B, H and W atoms, respectively.

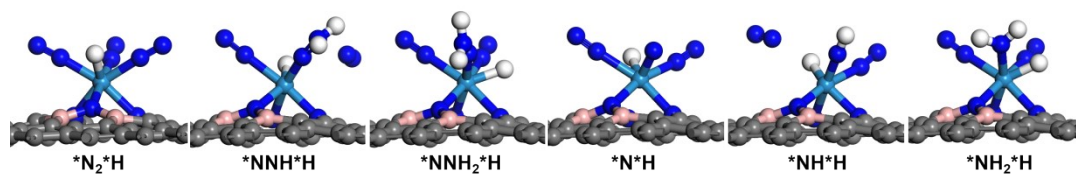

**Fig. S5** The configurations of competitive H adsorption on W-N<sub>3</sub>B<sub>2</sub>/G along distal pathway in the presence of other two adsorbed end-on N<sub>2</sub> molecules and N<sub>x</sub>H<sub>y</sub> intermediates. Where \* represents 2N<sub>2</sub>-W-N<sub>3</sub>B<sub>2</sub>/G. The gray, blue, dark red, white and green balls represent C, N, B, H and W atoms, respectively.

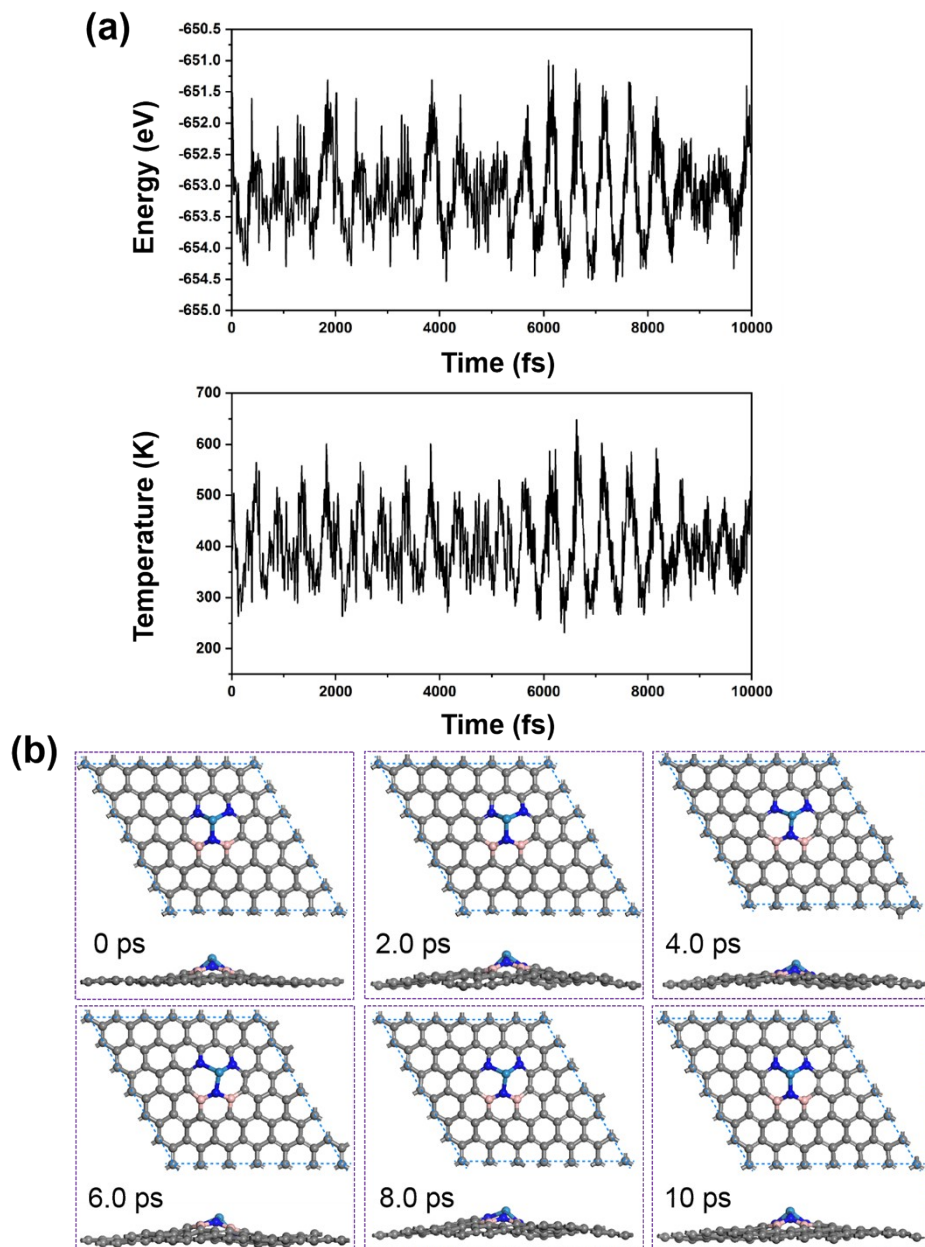

**Fig. S6** (a) The molecule dynamic (MD) simulations for variation of total energy and temperature of  $W-N_3B_2/G$  at 400 K lasting 10 ps with each step of 1 fs, in which the Nosé-Hoover method is employed with controlling temperature. (b) Atomic configurations of  $W-N_3B_2/G$  at 2 ps, 4 ps, 6 ps, 8 ps and 10 ps. Where the gray, blue, dark red and green balls represent C, N, B and W atoms, respectively.

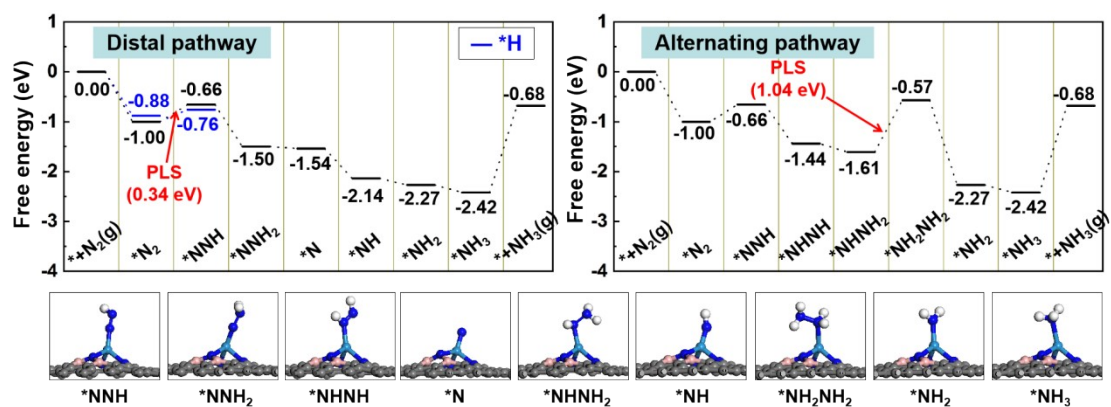

**Fig. S7** Hydrogenation free energies of  $N_2$  molecule along alternating and distal pathways on  $W-N_3B_2/G$  with only one adsorbed end-on  $N_2$  molecule, accompanying with adsorption free energies of H atom in the presence of no any species and only one end-on  $^*N_2$ . Where \* represent  $W-N_3B_2/G$ . The gray, blue, dark red, white and green balls represent C, N, B, H and TM atoms, respectively.



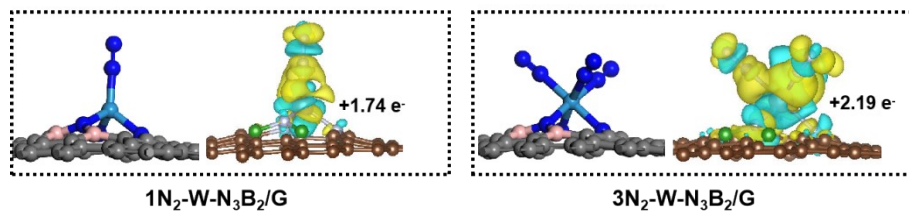

**Fig. S8** Differential charge density on  $W-N_3B_2/G$  in the presence of one and three adsorbed end-on  $N_2$  molecules, respectively. Where the isosurface levels are set to  $0.002 e/\text{\AA}^3$ . Yellow and cyan represent the accumulation and depletion of electrons, respectively.

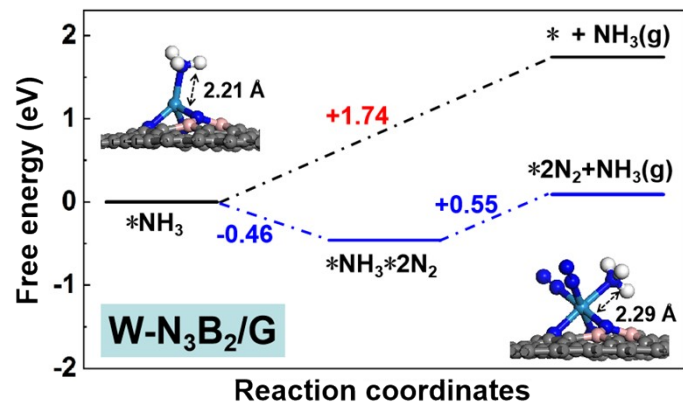

**Fig. S9** Ammonia desorption on W-N<sub>3</sub>B<sub>2</sub>/G in the presence of no any adsorbate and three adsorbed end-on N<sub>2</sub> molecules, respectively. Where \* represent the clean W-N<sub>3</sub>B<sub>2</sub>/G.

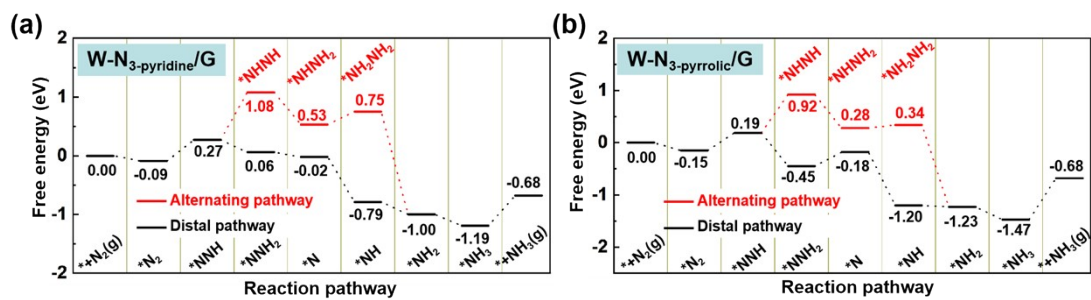

**Fig. S10** Hydrogenation free energies of the 3<sup>rd</sup> N<sub>2</sub> molecule along alternating and distal pathways on (a) W-N<sub>3</sub>-pyridine/G and (b) W-N<sub>3</sub>-pyrrolic/G in the presence of other two adsorbed end-on \*N<sub>2</sub>.

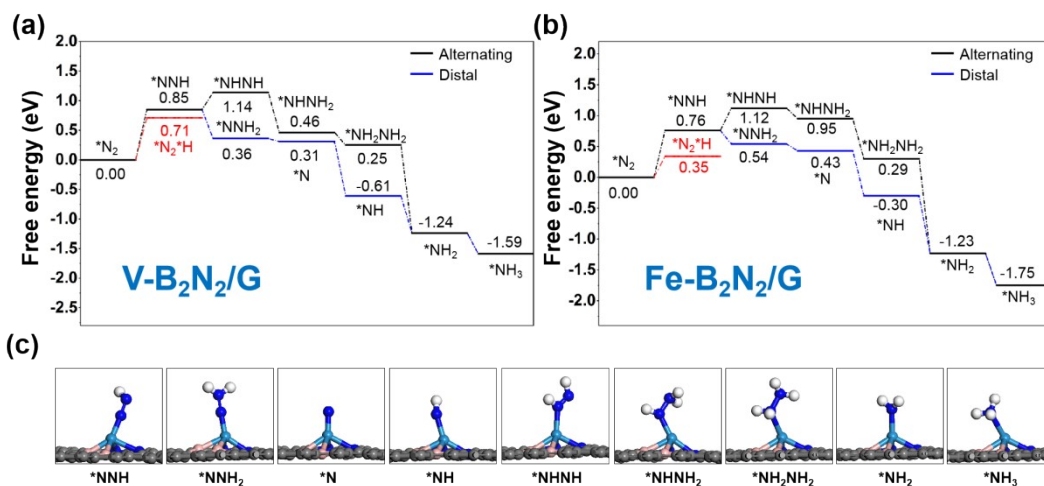

**Fig. S11** Hydrogenation free energy changes of adsorbed end-on \*N<sub>2</sub> along alternating and distal pathways on (a) V-B<sub>2</sub>N<sub>2</sub>/G and (b) Fe-B<sub>2</sub>N<sub>2</sub>/G, accompanying with competitive H adsorption in the presence of one end-on \*N<sub>2</sub>. (c) Atomic configurations of \*N<sub>x</sub>H<sub>y</sub> intermediates. Where \* represents V(Fe)-B<sub>2</sub>N<sub>2</sub>/G, and the gray, blue, dark red, white, and green balls represent C, N, B, H and V(Fe) atoms, respectively.
